# Supplementary material
Source: PubMed Central journal article supplement (PMC9633364)
Supplement: NIHMS1825704-supplement-1.pdf [file NIHMS1825704-supplement-1.pdf]

**A DNMT3B expression in 6DT1 tumors and normal mammary glands**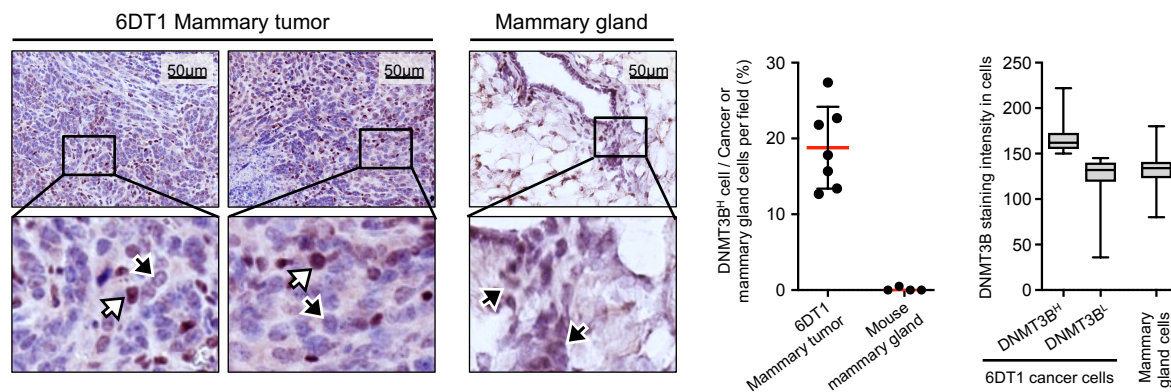**B DNMT3B expression in E-cadherin positive 4T1 cancer cells in tumors**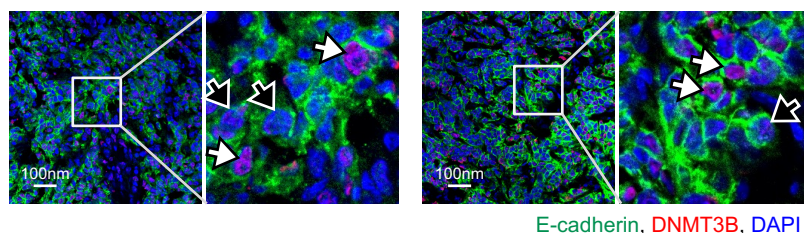**C DNMT3A and DNMT1 expression and patient survival**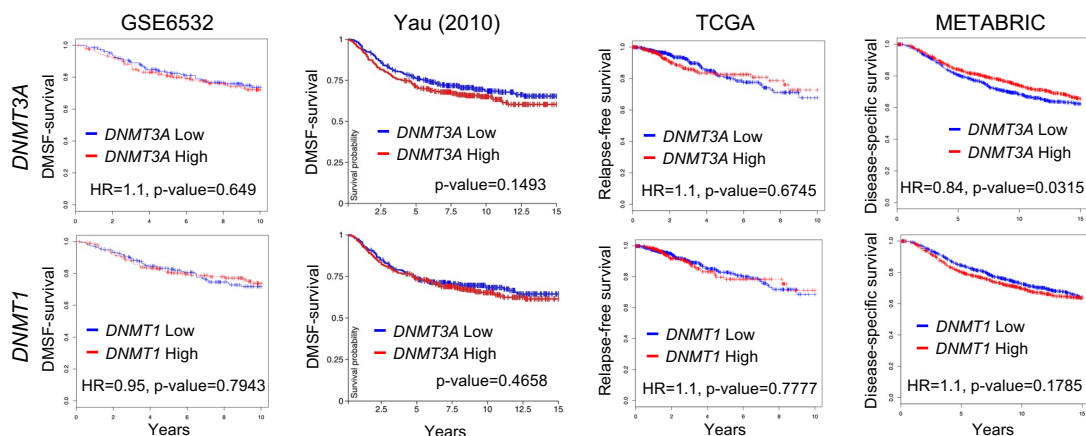**D DNMT3A and DNMT1 expression and tumor stages and subtypes**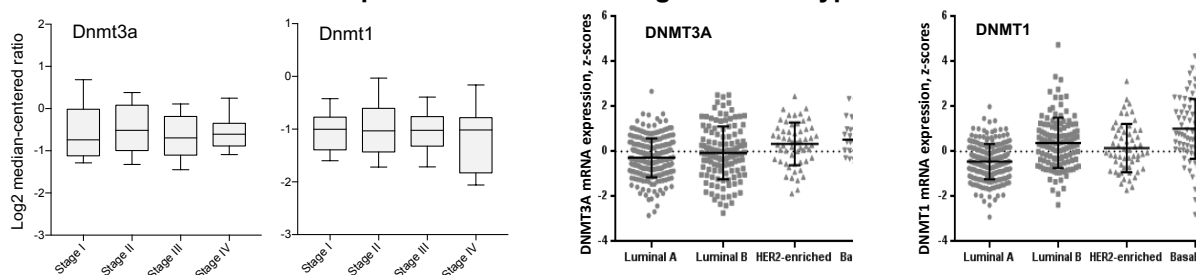

**Supplementary Figure 1. A.** DNMT3B IHC of 6DT1 mammary tumors and normal mammary glands from BALB/c mice. Percentage of DNMT3B<sup>H</sup> cells in cancer and mammary glands cells. Average DNMT3B intensity of DNMT3B<sup>H</sup> and DNMT3B<sup>L</sup> 6DT1 cancer cells and mammary gland cells on the right panels. Shown are representative images of DNMT3B<sup>H</sup> (white arrow) and DNMT3B<sup>L</sup> cells (black arrows). **B.** E-cadherin (green) and DNMT3B (red) IF of 4T1 mammary tumors. **C.** Kaplan-Meier plots for correlation DNMT3A (upper panel) or DNMT1 (lower panel) to patient survival in human breast cancer datasets. **D.** DNMT3A and DNMT1 expression levels in breast tumors at different stages (left 2 panels) and with different subtypes (right 2 panels).

**Correlation of gene expression and promoter methylation  
for DNMT3B target genes**

| Gene            | Spearman r |
|-----------------|------------|
| <i>PTPN7</i>    | -0.785     |
| <i>INPP5D</i>   | -0.599     |
| <i>CLDN4</i>    | -0.327     |
| <i>TCF7</i>     | -0.31      |
| <i>SFRP1</i>    | -0.278     |
| <i>PMEPA1</i>   | -0.273     |
| <i>INPP5J</i>   | -0.26      |
| <i>NF1</i>      | -0.239     |
| <i>CLDN9</i>    | -0.229     |
| <i>SOX9</i>     | -0.226     |
| <i>CLDN3</i>    | -0.118     |
| <i>DUSP4</i>    | -0.083     |
| <i>FZD1</i>     | -0.03      |
| <i>CDH11</i>    | -0.021     |
| <i>LFNG</i>     | 0.009      |
| <i>TNFAIP3</i>  | 0.035      |
| <i>SERPINE1</i> | 0.058      |
| <i>CLDN5</i>    | 0.092      |
| <i>WNT7A</i>    | 0.169      |

**A DNMT3B in cancer cells and mammary gland**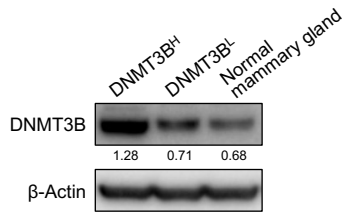**B DNMT3B, DNMT1, DNMT3A with DNMT3B-KD**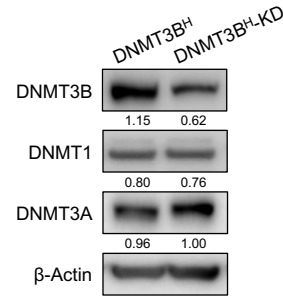**C Gating strategy for DNMT3B<sup>H</sup> and DNMT3B<sup>L</sup> cell detection**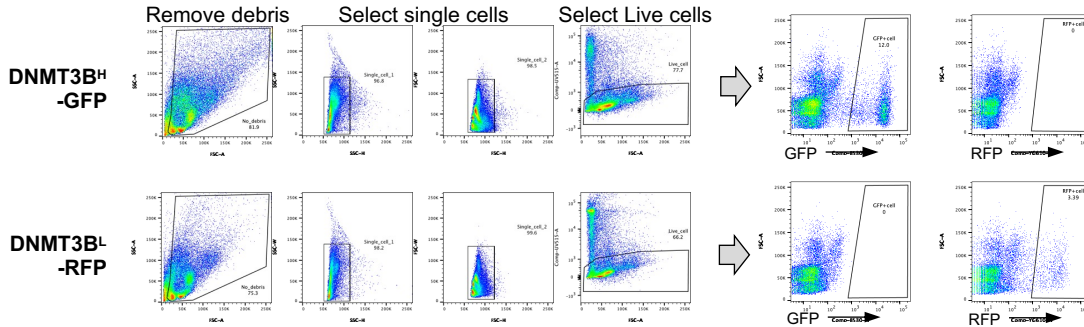**D DNMT3B<sup>H</sup> and DNMT3B<sup>L</sup> lung metastases**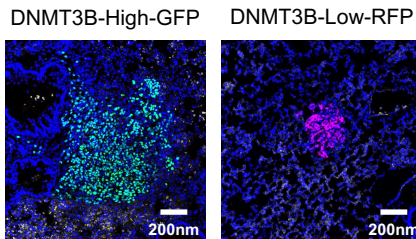**E Tumor weights**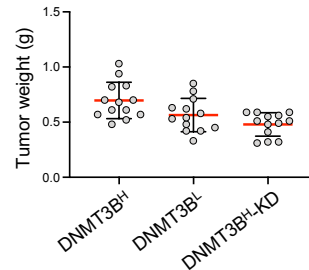**F Clonal composition of DNMT3B<sup>H</sup> and DNMT3B<sup>L</sup> cells in primary tumors**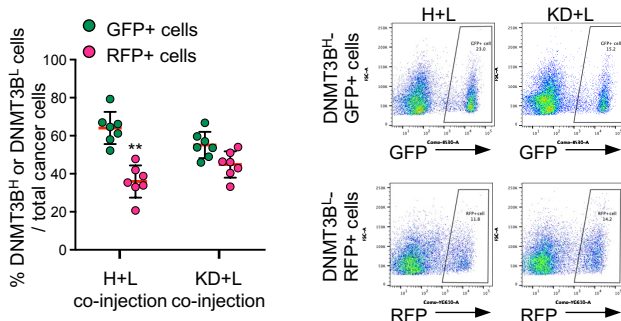

**Supplementary Figure 2. A.** DNMT3B Western blot for DNMT3B<sup>H</sup>, DNMT3B<sup>L</sup> 4T1 cells and normal mammary glands. **B.** DNMT3B, DNMT1 and DNMT3A Western blot for DNMT3B<sup>H</sup> and DNMT3B<sup>H</sup>-KD cells. **C.** Gating strategy to detect GFP<sup>+</sup> and RFP<sup>+</sup> cells in tissue samples using flow cytometry. **D.** Representative immunofluorescent images of metastatic nodules in the lungs at 4 weeks after injection of mixed DNMT3B<sup>H</sup>-GFP and DNMT3B<sup>L</sup>-RFP 4T1 cells. **E.** Weights of primary tumors at week 4. **F.** Flow cytometry of GFP<sup>+</sup> and RFP<sup>+</sup> cells in primary tumors at 4 weeks after co-injection of DNMT3B<sup>H</sup>-GFP and DNMT3B<sup>L</sup>-RFP (H+L) or DNMT3B<sup>H</sup>-KD-GFP and DNMT3B<sup>L</sup>-RFP (KD+L) 4T1 cells. Data are presented as mean ± SD. \*\* p < 0.01.

**A Gating strategy for CTC detection**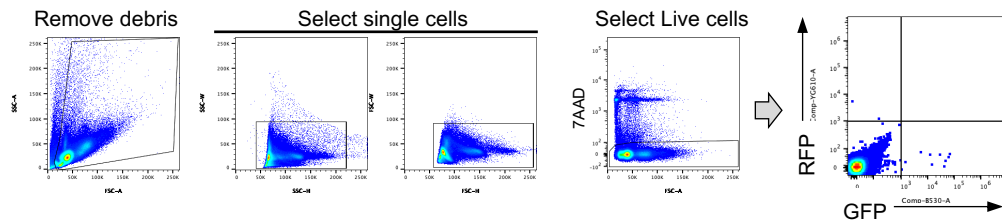**B Tumor weights and surface met counts**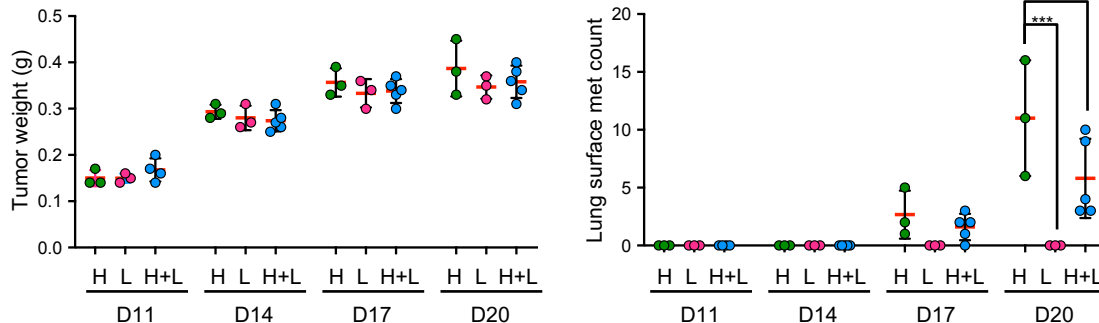**C Ki67+ tumor cells in primary tumor**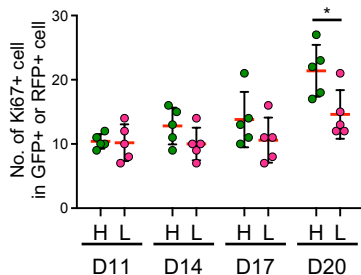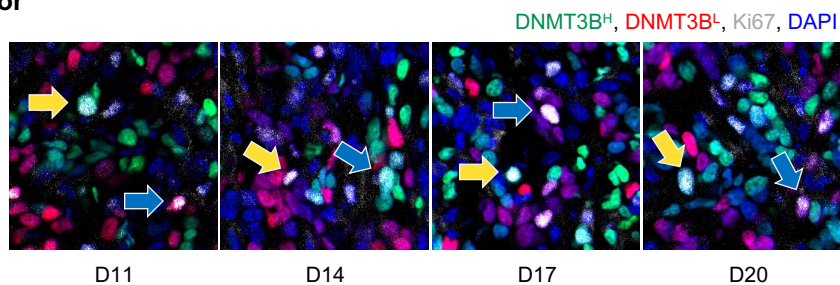**D Annexin V+ tumor cells in primary tumor**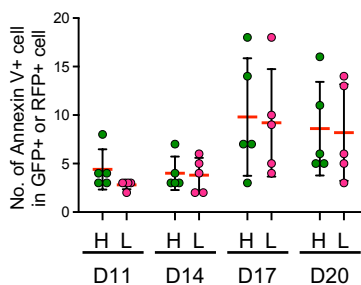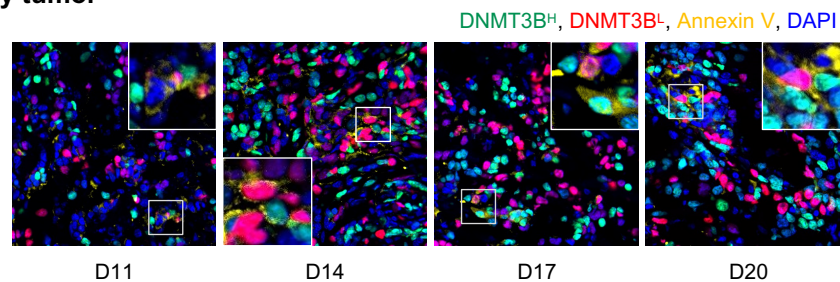**E VIM+ DNMT3B<sup>H</sup> cells with EMT morphology in tumors**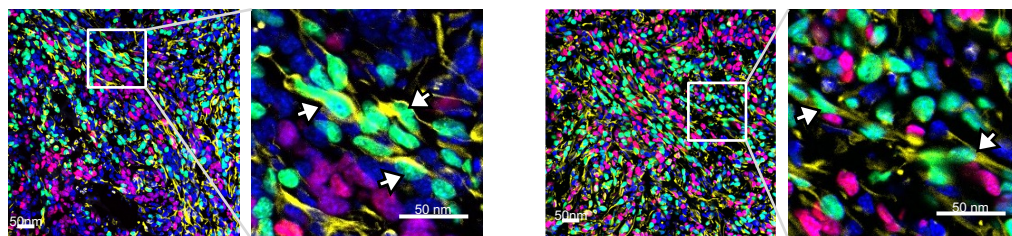

**Supplementary Figure 3. A.** Flow cytometry gating strategy to detect GFP+ and RFP+ CTCs. **B.** Tumor weights and surface metastases (met) counts in the lungs with time course experiment. **C.** Quantitated data and representative images of GFP+ (yellow arrow) and RFP+ (blue arrow) cells with Ki67 expression in primary tumors. **D.** Quantitated data and representative images of GFP+ and RFP+ cells with Annexin V expression in primary tumors. **E.** Representative images of VIM+ DNMT3B<sup>H</sup> cells with EMT morphology, indicated by white arrows, in primary tumors. Data are presented as mean  $\pm$  SD. \*  $p < 0.05$ , \*\*\*  $p < 0.001$ .

**A DNA methylation levels at Vim gene locus**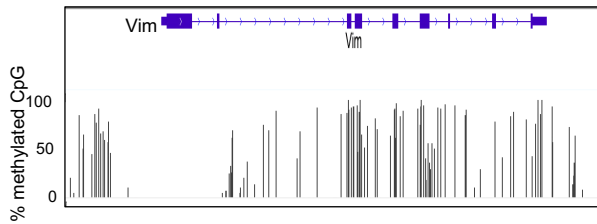**B DNMT3B enrichment at Snai1**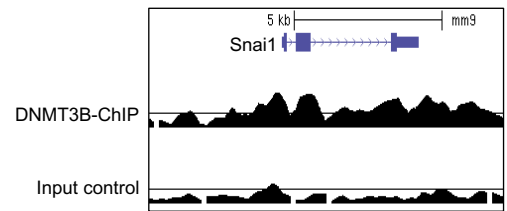**C mRNA expression of methylation-sensitive genes**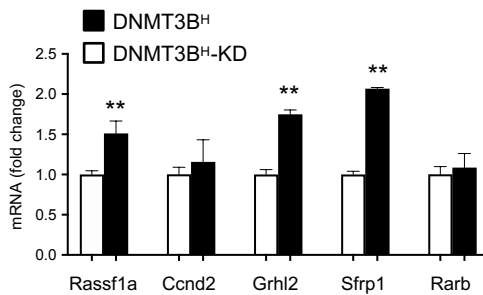**D DNMT3B enrichment at the promoters of Grhl2 and Rassf1a**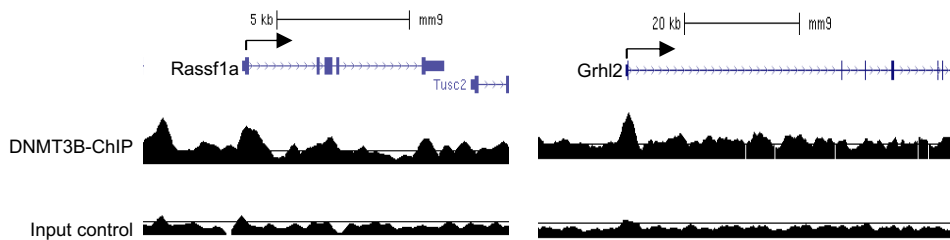

**Supplementary Figure 4.** **A.** High DNA methylation levels of CpGs in Vim gene body. **B.** DNMT3B enrichment in Snai1 gene body in comparison to input control. **C.** qPCR result showing increased mRNA expression of methylation-sensitive genes, Rassf1a, Grhl2 and Sfrp1, by DNMT3B knockdown in DNMT3B<sup>H</sup> cells. **D.** DNMT3B enrichment in the promoter regions of Rassf1a and Grhl2 in comparison to input control. Data are presented as mean  $\pm$  SD. \*\*  $p < 0.01$ .
